# Supplementary material for: A proteome-scale map of the SARS-CoV-2–human contactome
Source: PubMed Central journal article supplement (PMC9849141; doi:10.1038/s41587-022-01475-z), 2022-10-10

**Figure 4b**

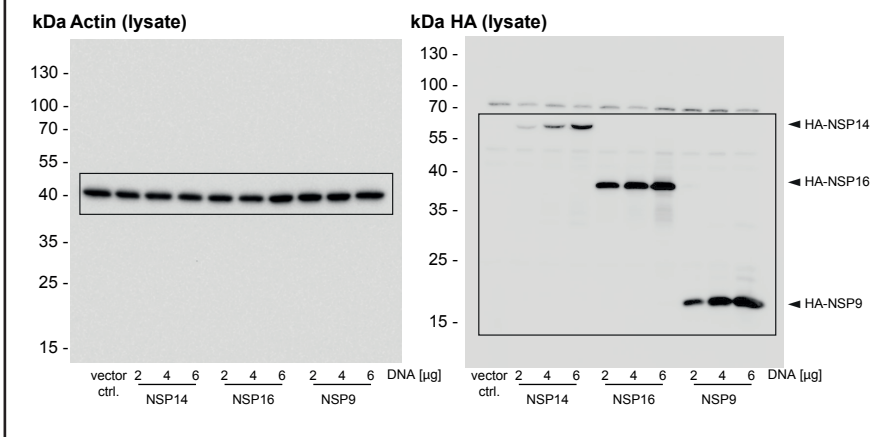

Supplement: 41587_2022_1475_MOESM18_ESM.pdf [file 41587_2022_1475_MOESM18_ESM.pdf]
